# Supplementary material for: panISa: ab initio detection of insertion sequences in bacterial genomes from short read sequence data
Source: Oxford University Press journal article supplement (doi:10.1093/bioinformatics/bty479), 2018-06-13
Supplement: bioinformatics_34_22_3795_s4.pdf [file bioinformatics_34_22_3795_s4.pdf]

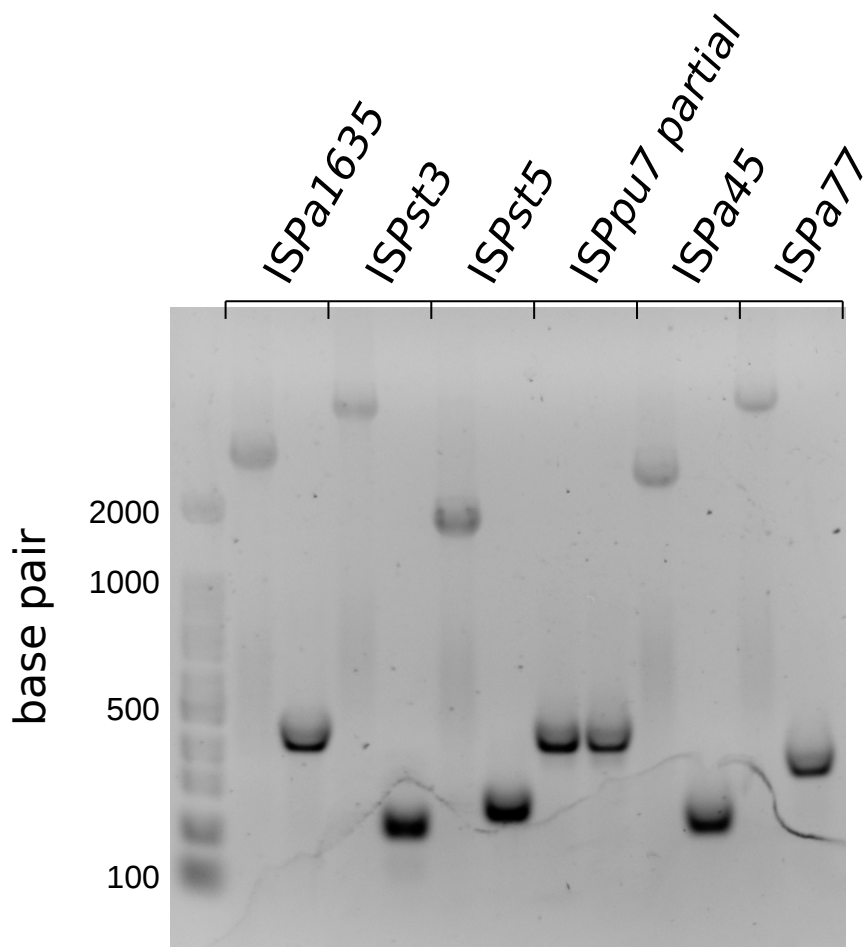

**Supplemental Fig.1: PCR validation of the insertion of the six different potential ISs detected in late isolates of *P. aeruginosa* ST233.** We used specific primers surrounding the insertion site (Supplemental Table 2) to amplify the six potential ISs in the isolates in which the ISs were detected (first lane) and in the first isolate (10-2007) as control (second lane).
