# Supplementary material for: panISa: ab initio detection of insertion sequences in bacterial genomes from short read sequence data
Source: Oxford University Press journal article supplement (doi:10.1093/bioinformatics/bty479), 2018-06-13
Supplement: bioinformatics_34_22_3795_s5.xlsx [file bioinformatics_34_22_3795_s5.xlsx]

## Sheet: Sheet1
Organism	IS Name	IS Family	IS Group	DR length	IS sequence	IS length	Typical size-range	IR
Escherichia coli	ISEc1	ISAs1	-	8 - 10	CAGGGAAAGATCATCAAAAGTTCACTTTTTGCACTAAATAATTCGCATTTTATGTTTAAAAATTGAGATATTCCTTATTACCTGAAGCTGTTTTTTATTGCTTATACATGATCAAATACTCCTTACCTAATTAAGGAGAACAAAATGGAACTTAAAAAATTGATGGAACATATTTCTATTATCCCCGATTACAGACAAACCTGGAAAGTGGAACATAAATTATCGGATATTCTACTGTTGACTATTTGTGCCGTTATTTCTGGTGCAGAAGGTTGGGAAGATATAGAGGATTTTGGGGAAACACATCTCGATTTTTTGAAGCAATATGGTGATTTTGAAAATGGTATTCCTGTTCACGATACCATTGCCAGAGTTGTATCCTGTATCAGTCCTGCAAAA…	1291	1200-1500	Y
	ISEc10	IS21	-	4 - 8	TATGAGACGACAATAACTCAGTCCGCCTGGCGCCGATTATTCTGGCCGGTTTTGTAACCTGAGTGTCATTTACATGATCCAACAGGAAATGGCGTGACGCTCAATACTTCTCAGGTCAGTTACTATATGACTCAGCGTAAGAAAGGTATAACTCAGCATATCTCGGCCATGAAGGCTGGTATCTCAGTCCGTTCTGGTCGTCGGATCGAAAAAGGAGAGTGGGCAAAAAACAGTGTTCGGCACTGGCGCACACGCAAAGATCCTCTGGAAGCTGTGTGGGACAGCATGCTTGTTCCTCTGTTGAAAGAGAGGCCGGCTCTGACACCAACAACTCTGCTGGAGATGCTACAGGATAAATATCCCGGCCAGTACCCCAACAGCCTTCGAAGAACAATGCAA…	2410	1750-2600	Y
	ISEc17	IS3	IS3	3 - 4	TGATCTTACCCAGCAATAGTGGACACGCGGCTAAGTGAGTAACCTCTCAGTCAGAGGTGACTCACATGACAAAAACAGTATCAACCAGTAAAAAACCCCGTAAACAGCATTCGCCTGAATTTCGCAGTGAAGCCCTGAAGCTTGCTGAACGCATCGGTGTTACTGCCGCAGCCCGTGAACTCAGCCTGTATGAATCACAGCTCTACAACTGGCGCAGTAAACAGCAAAATCAGCAGACGTCTTCTGAACGTGAACTGGAGATGTCTACCGAGATTGCACGTCTCAAACGCCAGCTGGCAGAACGGGATGAAGAGCTGGCTATCCTCCAAAAGGCCGCGACATACTTCGCGAAGCGCCTGAAATGAAGTATGTCTTTATTGAAAAACATCAGGCTGAGTT…	1258	1150-1750	Y
	ISEc18	IS481	-	4 - 15	TGTGTGATTCATAGACATCGTTTCACTATAATGCCTTACTATGAACAGGGAAATTCAGCAGCGGCTACAGTGGGTAAAACTCTATGAAACGTCTAGTGACGCGGGGTTCGTATGCCGTCGCTGCGGTATTTCCCACCCCACATTGCGTAAATGGTGGCGCAGATATCTGGCTCAGGGCATCGCTGGTCTGGAAAGCCATAGCCGTCGCCCTAAACATTCACCATCAACGAAAACCGGCGCTGGCGAAGTCGCTCTGATTCTGGAGTTACGTTCCCTGCGAAATTTGGGTGCAAGGAGGATTCAGAGCGAGTTAAAACGACTTCATGCAATCTCACTGGCAGTGGCAACGATCCACAAAGTTCTTTGCCAGAATAAGGTTAAACCTGTCGTTAAATTCCG…	1020	950-1300	Y
	ISEc20	IS110	-	0	CCCCGTTACTTTATTCGTACCCCTTATAATGGGGTGTTAGCCAGCCAGACCCGGCATGATTACTGCCCCCAGTCGTCCATGATCCGGGGGGTGATGTCACCGGGTCTGGTGGGGCGCTGGTAACCGCTAATAGGGGTCAGGTCAGGCACTTTTGCCGGGACCGTCTGTAACGTGGATGCCGGTACCTGCTCCCCGTGGTTATCTGGTTAACCCATATACAAGGGAGACAGAATGACCGAATCCAGCGATTACGAATCCGTCCAGGTCTTTATCGGCGTTGATGTCGGTAAAGATACGCATCACGCTGTAGCCATTAATCGTTCAGGTAAACGCCTGTTCGATAAAGCATTACCCAACGACGAAAACAAACTCAGGTCGCTAATATCTGACCTGAAACAA…	1459	1200-1550	N
	ISEc23	IS66	-	8 - 9	GTAAGCGTAAACTGACCGCCGTATGTAGCCATCAGACGAGAATTGGTAACTTAGACGCCCATCTGATATAGACGGACATCTAAGTATGGAATTACAGGACTGGCGAAAAGAACCTCGTAAAAACTATTCGAATGAATTCAAACTTCGTATGGTGGAACTGGCATCACAACCTGGAGCTTGTGTTGCACAGATTGCACGTGAAAATGGCGTCAATGATAATGTTATTTTCAAATGGCTCAGGCTCTGGCAGAACGAAGGGCGTGTTTCGCGGCGTCTTCCGGTAACGACCTCTTCTGACACTGGCGTTGAATTATTACCTGTAGAAATAACGCCGGATGAGCAGAAAGAACCTGTGGCGGCCATTGCGCCGTCTTTATCCACTTCCACTCAGACCAGAGT…	2532	2000-3000	Y
	ISEc29	IS4	IS10	9	CTGAGGTATCCCCAGAAATTCTGTAGTTAAAATAAAATGTTAGTTGATTGGGGAACATTCATGGCGGTTCCTGATCTGATCATTCGCCAAAACTCCCACACCGCGGATGCTCACCATGAATGTAAAAGCTATGCTCGCTGATTTCCTCACCTTTGTCACGCCAAAATCAATGCATAAAGCCCGATTTTCGGTTTTGCTAGATGCGGTAACCGCCCTGGCAAAGGATGCGTGTTGCACCGTTACTGCGATTGGCCGGGCGATGCCTGGCTCTTCAGATAAGGTCAGTATCAAACGGGCAGATCGTCTACTCAATAATCCTAACCTGCAACGAGAGCTGCCATTGATTTATGCTGCGCTGACGGCTTCTATTGTTGGCCATAAAACTAAGCCGATGATTTT…	1325	1200-1350	Y
	ISEc30	IS1	-	8 - 9	GGTGATGCCTCTAATTAGTTGAATCTGATGTATAATACGGGTTTTTGAGGTTATCTCATGGCCAGAGTTAATATTCATTGTCCCCGTTGTCAGTCAGCTCAGGTTTACCGCCATGGTCAGAACCCTAAAGGCCGTGACAGACTTCGCTGCCGTGACTGCCACCGTGTGTTTCAGCTCACTTATACTTATCAAGCACGTAAGCCGGGTATGAAAGAGCTGATCACTGAAATGGCCTTTAATGGTGCCGGGGTTCGCGATACCGCCAGGACACTGAAAATTGGTAGTAACACCGTCATCCGGACTTTAAAAAACTCGCGCCAAAGCGAATAACTTCTTCGCCTGTTACCCATGCTGATGTGGCGTTTATCTGCGAGCTTGATGAGCAATGGAGCTACGTTG…	766	740-1180	Y
	ISEc35	IS5	IS903	9	GGCGTTGTTGCTCAAATCAGGGAACTATCCCGCAGTTTGGTGATCTGATCTCTTAGGTTCACCACCGGGAGCGCCAGATGGGCAAGTCCAAGCACAAGATCAGCAACTGGAAACAGTACAACCAAGCCTTGGTGCAACGTGGTTCGTTGACCGTCTGGATGGATGAGCAAGCCATCCAGCAGTGGCATTGCCAGACCCATCATGGCCGCCGAGGGCGAGGCTTCCATTACAGCGACTCCGCCATTGAAACCGCGCTGATGCTCAAGGCGGTATTCAAGCTACCGCTGCGTGCCTTGGAAGGCTTCATCAACTCGCTGTTCGAGCTGATGAATGTGCCCTTACAGTCGCCGGACTACAGCTGTATCAGCAAGCGCGCCAAGACGGTCGAAATCAAGTACC…	1051	950-1150	Y
	ISEc38	ISL3	-	8	GGTTCTTCCGCAACTTGGGTGGAAGAAAATGGATGAAACTTTCTGGTGAACAAAGATCTAAGCTGTTTTAAGTCATGGGCAACTCAATGCACTCTCTTAAGACACTTCTACAGTTACCTTGCGGATGGCGATGCAGTCGACAAATTATTAGCTCTGACGGTATAACCCTCCATCTCCACGGAAAACGCAAAAAAGCACAATGTCCTGAATGCTTTAAGCGTAGCGACTCTGTTCATAGTTGTCGTCGGCGCCGGATACAGCATCTACCCTGCTCAGGACATACGCTATGGCTTGTATTTTCCGTCCGCCACTGGTACTGCCGTAACCCGGCTTGTTCACGTAAAATTTTTGCCGGGTCGCTTGCTCCCTTCGCCGGTTCACACCAACAGTCTTCACAGG…	1722	1300-2300	Y
	ISEc41	IS200/IS605	IS605	0	CCTTCCTCCACTGGGTACTCCCCCCAACGTAGGCGGGAGGGGAATTTGGGCTGTTAAGCCCGCAGTTTATCAGCCACGCTGATTCTGAATATACTTTTTCACAACTTCCAGCGGTGCTCCACCACATGAACCGATGAAATAAGAGCGTGACCAGAGTACGGGCTTTGAATACGCGGCGCGCAAATCAATAAAATCATTCCGCAGCCGCCTACTGGTAACGGACTTAAGGCTGTTTACCAGCTTTGTGAGTTGCACCAACGGTGGGTATTCAATCAGCATGTGAACATGGTCTGCCTCGCCGTCACATTCCTTTAACTCGGCGCCAAAGTCCGCGCATACCTCCGCTACATACTGACGCATGTTTGCATGATGCAATTCACCAAAAACTGGACGGCGGTA…	1841	1300-2000	N
	ISEc42	IS200/IS605	IS1341	0	TAGAATGCCTCCGGGAAACCTCGGCCTTCAGACCGGGGAGGAAAGGAGGCGGTTTTCCGACTAACTGTACTTTGCATAATCACATTTTCCTCTTTAGTATGTGAACACATGAAACGCGCATATAAATACCGGTTTTACCCGACAACTGAGCAGGCTGAGCTTTTAGCTCAGACGTTTGGCTGTGTGCGCTTCGTCTACAATTCCATCCTTCGTTGGCGTACCGATGCGTACTACGAGCGAAAAGAAAAGATCGGTTATCTACAGGCCAACGCTCGCCTTACGGCGCTCAAAAAAGAGCCTGAATACATATGGCTGAATGATGTTTCCTGCGTTCCCCTCCAGCAGTCGTTGCGCCACCAACAAGCCGCCTTTGCTAACTTCTTTGCCGGACGAGCTGCA…	1291	1200-1500	N
	ISEc51	ISKra4	ISAzba1	0	GAGGGCATGAAAAACCCTGGGGCAGTCACTGAATGAGGGACCAGCAGCGGTAAAATAACCGGCATAATTTTATAATGATGCCTCCGTTAGTTATGAAGGTTTACGTCATTAAAATTGCTGTTCGTGGTGTCAGTCCTATGGTCTGGCGTCGGCTGAGGATTGCAGCCGATACATCACTGGCTGCACTTCATTTTATTATCCAGATCATTCAGGGCTGGGGTGATGACCACCTGCACCAGTTTCATATTTACGGTAAAGATTACGGTATCACTTACGAGGGGGGAATTGGTTTTCCAGATAACCCGTTCCAGGTTGTGATTGATGATTTTGAGTTTGATGTCGGCGATCGCTTTACTTATGAATACAATTTCTTTGAGCACTGGATTCATGATATTCGCG…	2857	1400-2900	Y
	ISEc58	IS256	-	8 - 9	GAGGGTGTCAGAAATTTTGTGTGAGAGGCATACCATGATGCTGCCAAGGAGCATGTATGCCACGCAAGAAGAAGACGCCGGTGGTCACGCCGGCCATTGATCTGCCGAAGGAATTTCTCGAGAAGCTGATCCCGGGTCCGATGGACGCGGCCGGGGTCGAAGCCGTGTTCCAGCAGCTGAAGAAGGCCGTGATCGAGCGGGCGCTGGGCGCGGAGCTCGGCCTGCACCTGGCCGACGCCGAGGGCGGGAGCGGCAACCACCGCAACGGCCGCAGCGGCAAGACGGTGCTGACCGACGAGGGTCCGCTGCGCATCGACGTGCCGCGCGACCGGACGGGTACGTTCGAGCCGCAGCTGATCCCCAAGCACGAGCGTCGCTTCGCCGGGTTCGACGATCGGA…	1342	1200-1500	Y
	ISEc61	IS5	IS1031	3	GAGCCCGATCCGAAATTAAGTTGAGTGGTGTCAGCGTGTTAGCTTGACGCTGTGCCCGATCATTGATTCAGCGGTTTTGCAACGAACCGAGGGAAATCAACGATGTGGACCGACACCACTCGCGCGCATCATGCCCGCGCGGGGCTGGCTTTGCCAAGCGATTTGACCGATGCCGAATGGGCGGTGCTGGAGCCATTCTTTCCGCCGCCGTCGCGTGTCGGCCGTCCGCGCAAATGGCCGATACGGCGGATTGTCGAGGCGATCCTCTACCTGTTGCGCGGCGGGCTGCCGTGGCGGATGCTGCCGCCGTGCTTTCCGCCGGTCTCGACGGTGCGGCGCTGGTTCTACCTGTGGCGCGACAACGGGCTATGGCGAGGTCTCAACCATGACCTGCTGATG…	954	850-1050	Y
	ISEc66	IS110	IS1111	0	AAATGTAATGAACACATCCCACCCCATTAAGTAAGGTGCACAGTGATAGATGAAGGGAAATACAGGAAGGTGTGGAGCCTCGCAGATTTCCGGCATCATAGTGCCCAATACGGGATACAAAAAGTTCCCTCAGACTGGAGACTCCACAAATGAAATATACACCGGTTGGCGTTGATATCGCAAAACATCTGATTCAGGTTCACTTCATCGACGAGCACACAGGTGAAGTGATTGATAAGCAACTGCGTCGTCAGGATTTTCTGATGTTCTTCTGTAACCGGGAACCCTGCCTGATTGGTATGGAGGCTTGTGGAGGCTCTCAACACTGGGCACGGGAACTGACAAAGCAGGGGCATAAAGTCCGGTTGTTGCAGGCCCGCTTCGTTAAAGCGTTCGTCA…	1441	1200-1550	Y
	ISEc68	IS5	IS5	4	GGAAGGTGCGAATAAGTCCGAGATGTGAGATCATCGTGTTGTAACCTGAACCCAGAATGAGTAACCGGATGAGCCAGCAACTGACTTTTGCCGACAGTGAGTTTTCCAGTAAACGCCGCCAGACCCGCAAAGAAGTTTTCCTTGGCAGAATGGATGACTTGCTTCCCTGGGACAAATTACTTGGCGTTATCGAGCCTGTGTATCCCAAGGCCGGTAATGGTCGCAGGCCCTATCCGCTGGAAACCATGCTGCGTATTCACTGCATGCAGCAATGGTACAACCTGAGCGATGAGGCCATGGAAGATGCCCTCTATGAAATCGCCTCCATGCGCCAATTTGCTCGCCTGTCACTGGATAAAGCCATTCCAGACCGCACTACCATCATGAATTTCCGGCATT…	1197	1000-1500	Y
	ISEc70	IS1595	IS1595	8	CCTGATTACCACCATGCTTCAGCCCCTCAGGACTATACTTAAAGTATCCTGTTCTGGAGGGTTTAATCATGGCCAAGAACAAGGTTCAGTTTCAAAAAAGCATGAATATTCATGCCTTTATTCAGAGTTATGGCAGTGAAGAGCGGTGTCAGCAACGGCTGTTTGATATTCGTTGGCCTCAAGGCTTCCTATGTCCAAACTGCGGACATACCCACTATTGCAGGCTTCACTCGAGATCGGTTTACCAATGTAATCAGTGTCACCAACAAACCTCGCTGACTGCTGGAACCATTTTTGCCTACTCCAAATTGCCTCTCACCATCTGGTTTTTGGCCATCTATCTGATCACTCAAGAGAAAAATGGTGTTTCCGCTCTGGAGTTATCACGTTCGCTTGGCA…	1018	900-1100	Y
	ISEc75	IS1595	IS1016	7 - 9	GGGGCTGTCCTAGATAACTAAGATCATCTAGGATAGTTCTATGAGAAAAAGCAGACTCAGTCAGTACAAACAGGAACGGTTACTTGAGCTGTTTATTGCAGGCTCTACAGCCCGTATTGCCGCAGAGCTGGTTGGTGTCCACAGGAACACTGCCGCTTACTATTTTCATCGGCTCAGAGTGCTGATAGCAGAGCACGTTGATAAGCACTCTTGGTTTGATGGTGAAATTGAATTGGACGAAAGTTATTTTGGTGGTCGTCGTAAAGGCCTTCGTGGTAGAGGTGCTGCTGGCAAAGTGCCTGTTTTCGGGCTTCTCAAGCGTGGTGGCAAGGTTTATACCAAGGTCATACCCGATGCTAAATCGCGGACATTACTGCCAATAATTGAGTCAAAAATTTA…	717	700-745	Y
	ISEc9	IS1380	-	4 - 5	CCTAGATTCTACGTCAGTACTTCAAAAAGCATAATCAAAGCCTTGATAAATATGCATTCCTTCGAAATTCAGCTTTCACCCATTGGGTGAAAGAAAAGTGCTCAAAAATATGTTAAATTATCAGCTTTTATGACTCGATATATGGTAAAATAATAGTAAGAAAAGTAGTAAAAAGGGGTTCTAATTATGATTAATAAAATTGATTTCAAAGCTAAGAATCTAACATCAAATGCAGGTCTTTTTCTGCTCCTTGAGAATGCAAAAAGCAATGGGATTTTTGATTTTATTGAAAATGACCTCGTATTTGATAATGACTCAACAAATAAAATCAAGATGAATCATATAAAGACCATGCTCTGCGGTCACTTCATTGGCATTGATAAGTTAGAACGTCTAAAG…	1656	1550-2000	Y
	ISEcB1	IS3	IS150	3 - 4	TGAACTGCACCCCAAAAGTTGGACACTCAACGAAGTAAGGTGCAGTTTTTTATGAGTAAATATTCTCTCAGCTTTAAGCTTGAGGTTGTGCAGCACTATCTTTCCGGCATGGAAGGGCAGAAAGCGACTGCAAAGCGTTTTGGTATCGATCACAGTGCCGTTCGTAAGTGGACTGCTGCCTGGAAGCTTCATGGCGAAGCCGGACTTACCACCCGGCATTTCGCCTATTCTCCCGTCTTTAAAGAGTCCGTTATCCTGCATATGCGTGAGCACCGGTTGTCTGTTCGCGAAGTCTGTGCAAAATTCACTATTCCGGCCTTCTCCACGGTCCTTCTGTGGGAACGCCTGTATGATGAAGGGGGATTAGAAGCCCTCACTGACAGCCGACGCGGGAGAAAA…	1441	1200-1600	Y
	TnEc1	Tn3	-	0	GGGGTCAGTTTGGATATCAAAAATTATTGTACGTTAAGGCTACTTTTTAATCAGTCGTTGGTTCTCGATAAAGTGCCTGAATACGGCAAACCTGCGAAGTGCTGTAGCCCGTAGCATCTGCTGTTTCTCTAATGCTGAGTTTTTTTACTTGTCTGTAGTACAACACTTTCTGATGCCGTTCCTGATCGGCTTGTTTTCCCCGGTATTTACCCAACGTATGAGCTCGTTCAATTCCCTGTTTTTGGCGTTGGCGACGACTCAGCCAGTCCTTATGCGACATCGCGGCCATCAGGTCTATAAGCATATTATTTATTGAAGTTATCACTGCGCGGGTAATCGGATCTGATTGTGAAGGATCTTTATCTGAAAGGGCTTGCCATGATGTTGGAACATCCAGAC…	3854	>3000	Y
Mycobacterium tuberculosis	ISMt1	IS5	IS427	2 - 4	GGCGTGTCTCCCAAATTTTTAGGTACTGGCCAGCGAGGATTGGCCGGTGACGCGAGTGGGTGTGATTTCGGACGAGTTCTGGGCCGTGGTCGAGCCGTTGATGCCGTCGCATGAGGGCAAGCCCGGCAGACGGTTTAGCGATCACCGGCTTATCCTGGAAGGGATCGCGTGGCGGTTCCGTACGGGAAGTCCGTGGCGGGACCTGCCCGCTGAGTTCGGGCCGTGGCAAACGGTGTGGAAGCGCCATCACCGTTGGTCGCTGGATGGTACCTGCGACGAGGTGTTCGCCCACGTTGCCGCGGTGTTCGGGGTGGACGCTGAGGTGGCCGAGGATATCGAGAAGCTGCTGTCGGTGGATTCCACGAACGTGCGGGCACACCAGCATTCGGCGGGCGCTGC…	969	800-1000	Y
	ISMt2	IS21	-	4 - 8	TGTCAGCGGTCACGTATTTCCCCAGGTTTGAGGGGTTGTCCGTCACGTAATTCCCCACCCCGGCTGTCACGTAATTCCCCACCATGGGCGGTGTGTCTGCCCGGTGTGGGCCTTGCTGCAAGGTTCGCTCTGCATCCGTCGGCTGACGGATGGAAGGGCGCTGATGGCGAGGAGAAGTATCTTGATGCTCGATTTGGTCGAGTTGTTGACCCACTGGCACGCGGGCCGCTCTCAGGTCCGGTTATCGGAGTCGCTGGGCATCGATCGCAAGACGGTCCGCAAATATACGGCGCCGGCGATCGCCGCCGGTATCGAGCCCGGTGGGGAGCCGCTGAGCGCCGAGCAGTGGGCGGAGTTGATCGGCGGGTGGTTTCCTGAATGATCCGGCGGCGCGGGCGT…	2645	1750-2600	Y
	ISMt3	IS21	-	4 - 8	TGTCGACGGCACGTGAAAACTGACCCCGGCGCGGCACCCGAATTTTGACCCCCTGGTCGGGTGGACTGGCTCTACCCGAGCCAGGAGGACCGAAGGGAATGTTGACTGTGGAAGATTGGGCTGAGATTCGCCGATTGCATCGCGCGGAGGGTTTGCCGATCAAGATGATCGCCCGGGTGCTGGGGATTTCCAAGAACACGGTGAAGTCAGCGTTGGAATCAAACCAGCAGCCGAAATATGAACGGGCACCGCAGGGTTCGATCGTTGATGCGGTTGAGCCGCGGATCCGGGAGTTGTTGCAGGCCTATCCGACGATGCCGGCGACGGTGATCGCCGAGCGGATCGGCTGGGAGCGCTCGATTCGGGTGCTCTCGGCGCGGGTGGCCGAGCTGCGCCCGG…	2213	1750-2600	Y
Pseudomonas aeruginosa	ISPa12	IS4	ISH8	10	TCATACGTATGATCTTTAGGATTTGAATAGGTGCTTCATTCGTGATCTAATTGATTTTGCGAATAAAATAGAACGCCCAGAGGGCTAAAACGAATGAAGCAAAATCAGATTACCGCATTTTCAACCATTTTTGAAGCCCTGTTTTCAGAGCAACAATTAAATTCACTTGGTGTTCAAACTCACATGATTGAACGCTTTCGCCTGATCACTCCCGCAAAACTTTGCCTGGCATTTGTGTGTGCCCTGGGAAGTGGAAATGCCCGCACAATCGCTGATATACATCGTTACTTTAACCACTTGCATTCGATGTCAGTACGCCTTAAACCATTCCATAATCAGTTAGTTAAGCTCGGAACTCCTGAATTTATGCGTCAAGTGTTTGAGCAGGCGCTGGCACTT…	1387	1400-1800	Y
	ISPa1328	IS256	-	8 - 9	GAGGGTGTCCGAAATTTTGTGTAACCGGCTCATGAGCGACACTGTCGCTGAGAACTGGAGACACCATGAACAAGACGCCCCACACCATTACCGACGAACTGCTGGATCAGCTTCTGGCCAATTATCAGAAGCCTGAAGACTTGATCGGTACCGACGGCATCCTCAAGCAACTGACCAAGAAGTTGGTCGAGCGTGCGCTGGATGCCGAGCTGACCCACCACCTGGGCCACAACAAGCATCAGCCTGTCAGCAATTGGATGGGCAACACCCGCAACGGTTTCAGCAAGAAGAAACTCAAGGGCGAGTTCGGTGAACTGCCCATCGAGGTACCGCGCGACCGGCATGGCACCTTCGATCCGCAGATCATCGAGAAGCACCAGACCCGCTGGACGGGCTTCG…	1328	1200-1500	Y
	ISPa14	IS1	-	8 - 9	GGTGGTGTTTCAAAAAGTATGCTGAAACAAAGCAGGTTGAATTTTGATAAAATAGAGAAATGCGAATAACTCTAGAAATCAAATGTCCAACCTGCCTCAGTGACAGTATAAAGAAAAATGGCATCAAAGTAGATGGGAAACAAAACTATCAGTGCAAAGACTGTAAACGTCAGTTTATTGGTGACCATGCTCTGAGCTATCTAGGATGTCATTCAGGCATTACTCGAAAAATATTACAGTTGATGGTCAGAGGTAGTGGTATACGAGATATCGCTGAAGTTGAGCGAATCAGTATCGGTAAAGTTTTACGTACTTTAACCGAATCGACCTACCAAATTCAGCCTAAACAAAGTCATTATGAGTCTCTTGAAGTTGATGAGTTTTGGACTTTTGTGGGAA…	788	740-1180	Y
	ISPa18	IS200/IS605	IS1341	0	GCGCGAGAAACCCCGGCATTCATGCCGGGGAGGGATAGCGCGGCGGCGTTAGCCGCCCCTGTTCTCGCTCCTCCTTTAAACTATTGCTATCTTCACATTAAAAGAAATAAAATGTGATACATGACAAAACGCGCCTACAAATACCGCTTTTACCCAACACCTGAACAAGCCCAGTTGCTTGCCCAGACGTTCGGCTGTACGCGCTTTGTCTACAATCACATCCTTCGTTGGCGCACCGATGCCTTCTATCAGCGCCAGGAAAAAATCGGCTACATTCAAGCCAATGCCGAACTGACCCGCATCAAACGCTCCGGCGAATTTGACTGGCTCAATGACGTGTCCTGTGTCCCGCTCCAGCAGTGCCTTCGGCATCAGCAAGCGGCCTTTAAAAACTTCTTC…	1339	1200-1500	N
	ISPa20	IS3	IS3	3 - 4	TGATCTTGCCCAGCACGAGTGGACACCCCGTTAAGCGATAAACTGCAACGAGGTGAATCATGGCAAGAACCGCTACCCCGATGAAACAGAACCGTACCCGTCACTCCCAAGCCTTCAAGAATGAAGCGATGGCGCTGGCCGAGCGAATTGGCGTTAGTAAAGCGGCCGAACAGCTTGGTCTTCATGCGTCTCAGCTCTATGGCTGGCGCAGTAAGCAGCAGCAGACCCTGAGCAGCAGTGAGCGCGAACAGTCACTGGCCGACGAAAACGCCCGCCTCAAGCGGCTCCTGGCCGAGCAAGCCGAAGAACTGGCCATCGTAAAAAAGGCCGCGGCGTACTTTGCGAAGAGCCTCAAGTGAAGTACGCCTTCATGAGGACACATGCCCCAGCGTTTTCGGT…	1246	1150-1750	Y
	ISPa27	IS256	-	8 - 9	GAGGGTGTCAGAAATTTTGTGTTCGGGCATAACATGAGTAAGAGGTGCATGTACGCCAACCAAAAAGAAACCCTTGCGTGACCTGCCCAAAATCCCCAAAGAGCTGCTGGAGCAGTTCGGTGAGGGTCTGATGACCGCAGAGGCTATCGAGGATGCCTCTGCGGCGTTCAAGAAGGCCTTGATCGAGCGCGCTCTGCATGCCGAACTTGGCCACCACCTGGGCTATCCGCCGGGCGCGCAGCGCCCAGAGGATGAAACCAATCAGCGTAACGGCAAGAGTGGCCCGACGGTTTTGACCGGTGATGGCCCGCTGCGGCTGGAAATTCCTCGTGACCGAGACGGCAGTTTTGCGCCCATTCTCATCCCCAAGCATGAGCGGCGGTACACCGGTTTCGATGA…	1361	1200-1500	Y
	ISPa30	IS66	-	8 - 9	GTAAGCGTAACACGAACCCCACATTCCAGTTTTAGCTAATCCACCATACCCTGTTTGTATCATTCACCAAGCAGGGTTTCTTATGATCCGCAGAACGTCCAAACAATGGCTGGCGCTGTTTGACCAGTGCAAAGCCAGCGGTTTAACTCAGACCGAATTTGCTAAGCAGCATGGTATCGACCCAAGTTACTTTAGCTTTCGCAAGCGGCAGTTGCTTGCCTGGCAGCAGGACGACAATGACGGCTTTGTCGAATTAACACCGCACGGCATGATGCTTTGCCAGCCGATGTTGCTCAGGAAGCGGGATATTGAACTGCACCTGCCTGCTGGCACCGATGCCGTGTGGCTCGCCACCTTGCTCAAGGCGATGTCGTGATGAAGATGTTTATCGATGTGCCA…	2436	2000-3000	Y
	ISPa33	IS1380	-	4 - 5	CCCGGATTTCTCATGACCGCATAAACAAAAACGGCTGAAAGCCTTATGATTCTTGTCGCCAAACAAAGCCCCATAAGTCTTCAGCCGCGCACAAAATGCTACCAGAAAAACTCCACTTTTCACCCCTCTCTCGCCGCCTCGTCGAGGCCTCTTTCACCGGTGGTCACATCACCTCGGATGCGGGCTTGTTGCTGCTGCGCGAGGTCGACCGGCAACATGGCTTGACCCGCCGCCTGGCCAAAATCGTTCCCGATCGGCGTGATCCTGGGCGTGTCCAGCATGGACTGCAGACACTGCTCGCCCAGCGTATCTATGCACTGGCCGCCGGCTACGAGGATCTCAACGATCATGACGGCCTGCGCCATGACTACGCGCTGCAGACTGCGGTCAACCGCCTGC…	1561	1550-2000	Y
	ISPa35	IS5	IS903	9	GGCGTTGTTGCACAAACGCCCCCAGTCTGTAGGCTACCGTGCCCATGACGAAGCCTGCTCCCGCCCAATACCGTACCACCAACTGGAAAGACTACAACGCTGCGCTCAAGGCTAGAGGCTCGCTCTCGGTCTGGCTGGATCGTGACATGCAATGGCACGGCCAGCCCACCGGTCGTCGCGGTCGATCACCGACGTTCAGCGATGCCGCCATCCAGTTCTGCCTGACCATCAAGGGGCTGTTCGGCCTGCCGTTGCGCCAAGTCATCGGTTTCGTGCAGAGCCTGATGCATCTGGCGGGCCTGGATTGGCCCGTGCCTGACTACAGCACGGTCTGCCGCCGCCAGAAAACGCTGACCGTGAACATACCCTATCGCCCCAGTCGTGGTGGCTTGCATCTGC…	1031	950-1150	Y
	ISPa38	Tn3	-	0	GGGGTCGTCTCAGAAAACGGAAAATAAAGCACGCTAAGCGTGCGTGGAGGCTGGCACCCAGCGGTACAGCGTCGGAATGGACACGCCGAGGTTCTTGGCCACGTCCTTGGGCGGCACCCCGCTGGCCAGCAGCTTCTTGGCCGACTCGATCTTGCTGTCGGTCATCTTCGGCTTGCGGCCGCCTTTGCGGCCGAGCTGCTTGGCGACTTCCAGCCCGGCGCGGGTGCGCTCGACGGTCAGCTCGCGCTCCATTTCGGCAAGGCTCGCCATGACGTGGAAGAAGAACCGCCCGGATGGTGTGCCGGTGTCGATGGAGTCGGTGAGGCTCCTGAACTGGACACCGTGCTTGTGCAGATCGCCGACCAGATCGACCAGTTGCTTGACCGACCGGCCCAGCCG…	6455	>3000	Y
	ISPa39	IS3	IS407	4	TGACCTGCCCCCCGTTTTCCGGGCCAACCTGATCTTAGTAGAGTCCGTCTCACAAGAGGACGGACATGAAGAAGCGATACACCGAAGAGCAGATCATCGGCTTCCTGAAGCAGGCGGCCGCCGGCACGCCGGTCAAGGAGCTTTGCCGCAAGCACGGCTTCAGTGACGCGTCGTTCTACCTGTGGCGGCGCAAGTTCGGCGGCATGGATGTGCCCGACGCCAAGCGCCTGAAGGCACTGGAAGCGGAGAACGCGCGGCTCAAAAAGCTGTTGGCCGAGTCGATGTTGGACAACGAAGCGCTGAGGATCGTGGCGCGGGGAAAATACTGAGCCCGCCGACGCGACGGGCTGCCGTCGCGGACGTGCGGGCGAAGCTGGGCCTGTCGGAGCGGCGGGCCTG…	1254	1100-1400	Y
	ISPa40	Tn3	-	0	TGGGTGCCCGCAGAATTCGGAAAAAATCGTACGCTAAGCCGCGCCATGTGCTTGCGCGCGAGCGCTCTCAAGAGGATGGTCCCTCGTACTTCCGAAAAGCGCGCCAAAGCACAACGTCATAGACGACCTTGAGTAGGCCGCAGGCCACCAGCGGCGCCGCCAGCCAGCCGGCGGCGAATAGGGCGCCGCCAATGGCGGGGCTCGCTATGGCATTGAGGCGCTTTACCGCACCGCCGTAGTTGTTTTCCCAGTGGCTGACGATCAGCTTCTCGGACAGGCCGGTGAGTTTGGCCGGATCGCATGAAAGAGGTTTCAGTTCGTAAGGCATCTTGGCTTCCTCAGCAAGGTGGATCGGAAACGGCGCGACGAAGGCTGACTCGATCAGGTTCAGCCTTGGTT…	6592	>3000	Y
	ISPa45	IS4	IS4	10 - 13	CAATGTCATCAACTTAAGGAATTTTTCCTATAAATATCATATAATTAGCGCTAAATTCAGCGCATAGGAGAAACCCTTTTGGCCCCTCATTCCACACCGTTTGACACCGCCCAGCAAACCCTGGCTTGAAAATTGTACAAAAAATAACCAGTCAGCTCGATTGTCCCGACTTCATCGATACCCACCGCCAGCGCCCTCACGACTTTACCCGCCGACGCCAACTGACCTTCAAGAACCTCGTCCTGTTTTTGCTCAATCAGCCACGCACCGCCCTGCAAACCGAGCTCGATCAGTTCTATCGCGTGCTCAACCAGGCCTCGGCCGAGACCCAGGTGGTCACCGCGCAGGCCTTCAGCAAGGCGCGCGGCAAGCTCAAGCCCGAGGTCTTCGAGAGCCTCA…	1637	1400-1600	Y
	ISPa47	IS630	-	2	TTAACCTGGCAAATAAATAGGGCATATTAGATAATCTGTCTCCATGAAAATAGATGCCCGTAAACTCAGCCCCCAAGAACAACGTGAAAAGCGCTCCACGGCCCTACGCATGCGTGAGCAGGGTTACACCTATAAGGCTATTGGCGAAGCGGTTGGTGTTCACCCCCGCACTATTGCTCACTGGGCGCAGGTCGCAGAACATAAAGGCGAAAAGGCTGCCATTGCCGGCGGCCAGCGTGGTGTGCGCCAGGGTGATCGCCGCAGTTTGAGCTCCAGCCAGGAAGTGCTGATTCGCACCTTGATGACCGATAAGATGCCCGACCAACTCAAGCTCGGCTTTGCGCTCTGGACGCGTGATGCGGTGCGAGAACTGATCCGCCAGCGCTGTGGTTTTCTCAT…	1107	1000-1400	Y
	ISPa56	IS3	IS2	5	TGAGATAGCCCCCTAATTCCCCGGCCCCGTCCTATCGCTTATCTTTGAAGATAGGAACAGGACTGTGCATATGACTAGGCATACGGAGTCAGTAGAAGTAGTCGTGAAGGACCAGCGCCGCAGGCGCTGGTCTCTCGCAGAAAAGGCGGCGCTGGTGCGCCGAACCTACGAACCAGGCATGAGCGTGTCATTAGTCGCTCGGCAGGAAGGCGTCTCGGCTGGACTGCTGTTCCAGTGGCGCAAGCTCGAACGCCAGGGTGCTTTGACCGCCGTCTCCGCTGGCGAGGCAGTCGTGCCCGCATCCGAGCTGGCGGCTGCCCGCGCGGAAATCGCCAAGCTGCAGCGCGTGCTCGGCAAGAAAACCTTGGAGAACGAAATCCTCAAGGAAGCCGTGGAGTA…	1359	1300-1400	Y
	ISPa59	IS30	-	2 - 3	GGCGGCGGCAAAAACTGAGTGCAACACCTGACCTTTCCGGTACGGTGCTGCCCCTATGTCTTATTCCGAACTCAGCGTTGAAGAACGCGCCACCATTCAAATCGGCCGTGCCCAAGGGTTCAGCCTGCGCAAGATTGCTTGCTTGATCACCCGATCCCCTTCGACCATCAGCCGGGAGCTGCGCCGCAATCGAGATGTCTGTGGCGGCTACTCGGCCCGCATGGCCCAGCAGCAGATGCAGGCCCGCCGCCAACGCTGTCGACCGAAACGAAAGCTCTTGCCGAGTAGTGAGCGCTTCCAGTTGGTGGCCCATATGCTGCGCGAGCGTTTGTCTCCCGAGCAGATTGCCGGCAAGCTGCGCAGCATGAACATTCCCAGCCTCAGAGAAGCCTACGTCTG…	1113	1000-1700	Y
	ISPa60	ISAs1	-	8 - 10	CAGGGCAATCGCATGAACGCCTGCCGATTTGAATGAGTCCTTTCCCAGCGGGCATCCTGAGCGCCTCTCTACTCAGGATGCCCTGCAATGTCGCATCACATACCAATCTCCGATGTTCTGGTCGCCATCAATGATCCCCGTCAGCAGGGCAAGATTCGTCACGACCTGGTCGAAACACTGGTCGTGGCTATCTGCGGCGTGCTTGCCGGCGCTGACACCTTCATCGAAATCGAACTCTGGGCTGAGCAGCGGCTGGACTGGTTCCGCCGTATTCTGAAACTACCCCACGGCATTCCCTCACACGACACCTTTGGACGGCTATTCAGCCTGATCGATCCAGAGGAGTTCGAGCAGGCCTTCCGCTGTTGGGTTGCGGCGATCCTACCGGCCCTTTCTCCG…	1228	1200-1500	Y
	ISPa61	ISL3	-	8	GTTGATTCACGATCGCCGGATTCGTCTGGTGCGTGATCGTGATCTGTTCGATCAGCGCGTCCTGCTTCAACTACCAGTGCGCCGAGTCGATTGCCTGAGTTGTGGGCGGGTGACCGAGCGGATCGACTGGTTGGAGCCAGCATCTCGGCTGACCCAGCGGTTACGGATATGGCTCGAAAGCTTGCTGCGGCTGCTGCCGATCAGCCACGTCAGCCAGCTCACCGGCCTGCATTGGCACACCCTCAAAACGCTCGATAAACGACGCCTTCAAGCCGAGGTAGGCAACTTCGATTCAACCGGTGTCCGCCGCCTGGTGATGGACGAGTTCGCCCTGCACAAAGGGCATCGCTATGCCACGGTCATCATGGATGCCGAGCGAACGCGGGTATTGTGGGTCGG…	1219	1300-2300	Y
	ISPa62	IS110	IS1111	0	TGCTGTAATGGACTCTCCCCACACCACAGTTCTATACCAAGGTGTCGAGGTTTTCTGAGCGGGAGAGTCGTTATGAAGCGCATTGCCGTTGATCTGGCCAAGTCCGTTTACCAAGTTGCCGAGAGTGTCCGTTTCGGCCAGGTGGTGCAGCGCAAGCGGCTGAACCGAGAGGCGTTCCGGCGATATATACAGGAGCAGTCCGAGCCGGTCGAGTGGGTGATGGAGGCCTGTGGTACAGCGCATTACTGGGGGCGGTTGGCGCAATCGCTCGGTCATCAGGTGAAGCTGCTGCACCCGCGCTACGTGCGGCCCTATCGCCGTCGTAACAAAACCGACCGTAATGACTGCGATGCCATGCTCGAAGCGGCGCGCTGCACCGACATTCATCCCGTGCCGGTG…	1382	1200-1550	Y
	ISPa65	IS21		4 - 8	TGTTGAATCACGAGCAAAACTGAGCCACTGAAGGGTCTCCGTCACGTCCAATTTTGAGCCACGTTATCCACCTATCCTGCTGCTTTTTGCAGCAGCGGGGGACAGGAGTGATCAACGTGAGCACATTGAGCAAATTGCGCCGCATGGTCCACCGTGACCACCTGAGCGTGCGCGAAGCCAGCCGCAGGCTTGGCATCTCCCGCAACACGGCCACCAAGTGGCTTGAAGCCGATGAGATGGTCGAACCCCGTTATCCCAAGCGGGCGGCCATCCCGAGCGTTCTAGATCCTTACAAGGAACAGCTGTCCACCTGGCTGAAGGCCGACAGCCACCGCAACAAGCGCGAGCGCCGTGGCATCAAGGCCATGTTCCGGGCATTGCGGGCCATGGGCTATCCGG…	2520	1750-2600	Y
	ISPa67	IS5	IS427	2 - 4	GGCTGTTGCCGTTTCGATCTAACTGATTGATCTATAAAAGCAAACTCGTATCGTTGAAGCTCTAACCCAACATCGATACGAGTTTGCAATGCCCCGATTACTGCTCAGCGATGAGCTTTGGTCGAAGCTGCGGGAAATTCTGCTGCACAAGGCCATCTACAACAAGCGTGATCTACGAATGACCGTGGAGGGCATGCTGTACCGCATGCGCACGGGCTGCCCCTGGAGAGACCTGCCTGCAGCGTTCGGGAACTGGAACAAGGTCTATAAACGCTTCAATGCATGGTCTGCTGCCGGCAAATGGCTCAAGGTCTTCAAGGTGCTTGTGGTGGAGCCCGACATGGAGTGGGTATTCATCGATGGCAGCTATGTCAAAGCTCACCAGCACAGTGCAGGTGC…	852	800-1000	Y
	ISPa7	IS1182	-	0 - 60	CAGACCGTGTAAAAACGTTGGCATCGTCCTTGCTGTGATTTGATGGATTCAAAATCAGCGGGGGACGCCAATGAAGCGCTTTATCCAGGGAGAGCACCGAGGGCAAAGCACACTGCTTCCCGAGAGCTTGGATGACTACGTGGCGGACACCAACCCGGTGCGGGTGGTCGATGTTTTCGTCGATGAACTCGACCTTGGCCTACTGGGTTTCGAGGGTGTCGTCCCGGCGGAAACCGGCAGACCCGCCTACCATCCTGCTGACCTGCTGAAGATCTACATCTACGGTTACCTCAACCGTATCCAGTCCAGTCGACGTCTCGAACGCGAGAGTCAGCGCAACGTTGAGTTGATGTGGCTGACCGGACGTTTGATGCCGGACTTCAAGACCATCGCCAACTT…	1669	1330-1950	Y
	ISPa72	IS1595	IS1595	8	CCTGATTAGAAACCTGCCTCAGCGAGGCTCAACCCATGAGCTTGTGACCCACTAATCTGGAGTCCTCTTACAGTGGGGTGAGCATCATGGCCTTCAACCAGATCCAGTTCCAGCACGGCATGTCGATTCCGGAATTCCTTCGTAGATTCGGCACTGAGGCACAGTGCGCCGAAGCGATCAAGGCCGCGCGCTGGCCTGATGGATTTCGCTGTCCGCGCTGCGCCAGCAGTGATCACTATGTGGTCGGCCACGGCGCCCGCAAGCTCTTCCAGTGCAATGGCTGTCGGCATCAGACCTCCCTGACCGCAGGCAGTCTCATGGCGCACACCAAACTGCCCCTGACGACCTGGTTCTTGGCCATCTACCTCATCAGTCAGGCTAAGACAGGGCTGTCGGCCC…	1048	900-1100	Y
	ISPa8	IS5	IS5	4	CAGCCTGTTGAAATTCGCCTACGGCCTGTCTGACTTTGCCGTGTAAGGTTTACGATATCGGCTCCAATCTGCCGGGAACCCCGATTTCCATGCGTGGCGCCGATATCACTCAGGAATCCTTGTTCACTGTCGCCAAGCTCGATGACTTCGTGCCAGCGACTCACCCCCTGCGCGCCATCCGCAAGCTGGCAGACACCGCTCTGCAGCGGATGAGCGCCCTGTTCGACACCTTGTATGCCGACACCGGCCGCGCCTCGATCGCCCCCGAGAAGNTGATGCGGGCGCAGTTGCTGCAGTTGTTCTACTCGCTGCGCAGCGAGCGGATGCTGATGGAACAGCTGGGCTACAACCTGCTGTTCCGCTGGTTCGTCGGCCTGGCCATTGATGATCCGGTGTGGG…	1324	1000-1500	Y
	ISPa9	IS5	IS5	4	GAGACGCTGCAAAAATAGCCAACCGCCCCCATCCTTGGCACACTGAGCCCCCAACCAGCCCCTCTTCGTGAGCCTTGTTACGCACGTGCAGAAGACCTTCTCCGAGCTCGAATACACCGGCAAGAAAAAGCAGACTCGTCGCGACCGCTTCTTGGCTGACCTTGAACAACTGGTGCCTTGGGCACAACTAGAGGCGCAAGTGGTTCCGTTCTATAGCGACACCGCAGGCAAGCGCGGGCGCCCTGCAATTGGGTTGTCGCGCATGCTGCGTATGTATGTCGTGCAGCAGTGTTTCGGTTTCTCCGATGAAGGCACCGAAGATGCCGTCTACGACAGCCAGGCCATTCGTGGTTTTATTGGCATCGACCTGGGCCGTGAGTCAGCCCCGGATGCCACCAC…	1207	1000-1500	Y
Staphylococcus aureus	ISSau1	IS30	-	2 - 3	GACGGATTGTAATATTAAGTGCAACACCTATAAAAATTCATAAAAAATGCCCATAATTGGCACTTTGTTGTAAGATGTTAATAACCACAAAAACACATACAAGGAGTGCCAACATGAGCTATAACCATCTTACACTAACTGAACGCGCACGTATAGAGGTTTTACGTCAAGAAAATTATTCTTTAAGATCTATTGCACGTAAATTAAAACGATCTGTATCTACTATCTCACGTGAAATTAGTAGGAATAATTTAAATCAGTCATATCAAGCTGAAACAGCTCAAAAAAATTATGAAACCAAAAGAAAACTTTGTGGTCGTCCTACTCGATTTACTCCAGAACTTGGTAATATCATTAAATATTATTTAAAATGCCACTGGTCTCCTGAACAAATCGTAG…	1070	1000-1700	Y
	ISSau2	IS3	IS150	3 - 4	TGAAATGCTCCCTTCAAAGTAGACATTGAAAAAATGAAAACTTTGAAGGGAGCTTTATTTATGTCAATAAAACCTAAAGTAGACATAGATGTACTGCTATATATGTTTCAAGAATATGAAAAAGGCGTGTCGTTTCAATACTTAATCGATACATTACAATTAGATATTAATGTCAATACTTTGTATCCTAAGTATAAATATTATAAAACCCATGGTATTGAAACACTACTTACACAAAAACAATACAATCACTATTCAAAGGAACTAAAATTAAAAGTTGTAAATGAATATTTGAATTCAAATCAATCAACCCAAGACATCGCAATCAAATACAATATTCGTAGTTCGACACAAGTCAAAAATTGGATAAAAATGTATACTGTAGGAAAAGAGATTAAG…	1660	1200-1600	Y
	ISSau3	IS1182	-	0 - 60	GAGTCTGGGACATAAATCCCTAAAAAAACAGCAGTAAGATATTTTCTAATTGAAAATTATCTTACTGCTGTTCTCTATTTATACAATACTTCGTATTGAATGGCTTCGCTTTCCTAGGGTGCCGTCTCAGCCTTGGTCTTCGACTGGCACTGCTCCCTCAGGAGTCTCGCCATTAATACTACGTATTAACATGTAATTTTACTTTGAAATACTTTAAAAAAATAAGACACTTTCGTATAATTTAATAAATACCACTAAACTAAATTCACGAGGTGCCTTATGTATAAAAATTATAACATGACCCAACTTACACTACCAATAGAAACTTCTGTTAGAATTCCTCAAAATGATATTTCACGATATGTTAATGAAATTGTTGAAACGATACCTGATAGCGAA…	1946	1330-1950	Y
	ISSau4	IS3	IS150	3 - 4	TGACCCCAATTAGTGGGAATTATATAAAAACACTTTCGTTGAATTCATATTAAAATGAATCATACGGAGGTGTTTTTTCTATGAAAAGAGTTTCTTATTCAGTAGAAACAAAGTATAAAGCAGTTGAAATGAAAGCAGCAGGATTTTCAACAAAAGAAATTATGAAAGAATTAAATATTAAAAATAGAACACAAGTGGAAACTTGGTGGCGATGGTATCGAAATGGGGAAAGTTATAGATTTTCACAACACGTTGGTAAACAATATACCTACGGTAAAGGATTAGAAGAGCTGTCAGAAGTAGAACAATTAAAATTAGAAAATAAGAGAAAAGATATAGAATTGGATATTTTAAAAAAGTACAAGGCATTGGAAAGGAAGTGGTACCAACAGTAGTCAT…	1261	1200-1600	Y
	ISSau5	IS30	-	2 - 3	CAACTCCCTATACGCTTTAGCGGTGGTATTGGGAGTTGATGAACATATATCCTCTTATAACTTATTTTATAAATAACCTTTTTAAAAGTAAAGGAGGATATACATGAAAAAAAGAAAAAAACGTAAAGAATTAGACTATAAAACACGTCTAGCTATCGCAAAGTATTTAAATGATGGTTTAAACATCATTCAGATTTCTAAGATTTTAGGTCGTGATGATGCGGTTCTTTATAGAGAAGTAAATAAACGTTCTGTTGATGGTGTTTATAATCCTTTATTAGCTGAGGAAGATGCTATAAAATCGCGTAGTATTTCAGATGAACAAGTTGCTAAACGTAGACGTTTGAATGATGAAACAAAAGCATATATTGAAGAAAAACTTTCATTAAAATGGTCTCC…	1136	1000-1700	Y
	ISSau6	IS6	-	8	GGTTCTGTTGCAAAGTTAGAAATATAGTATAATAGTCAACAAAAATGAGGTGCAGAGGATGAATTATTTCAGATATAAGCAATTTGACAAAGATGTCATTACTGTAGCCGTTGGCTACTATCTAAGATATGCATTAAGTTATCGTGATATATCTGAAATATTGAGAGAACGAGGCATCTATGTTCATCATTCAACAATTTATCGATGGGTACAGGAATATGCTCCTATTTTGTATCAAATTTGGAAGAAAAAGAATAAGCAAGCTTATTATAAATGGCATATAGATGAGACGTATATCAAAATTAAAGGGCAATGGAATTATTTATATCGCGCTATTGATGCAGATGGCCATACACTAGATATTTCGTTACGTAAGAAACGAGATAATCACTCAGCATA…	793	700-900	Y
	ISSau8	ISL3	-	8	GGTTCTATAATAAATCGGACTGATAGAAAAAGTTTTTTACTTTTCATCTGTCCGATTTTTTGATTTTGAATATAAAAAAAGCGCAATTATCTCTATAATTAAAAGTGCCTAAACAAATAACTAAAGGAGATAATGCGCCTATGAACAATGTTATACTAAATACCTTTGATTTGAAAGATAAAAATATTATTTTTGACGGTAAACTTGAGAAAATTGAGTATAAAGGGAGAAAGTGTTTCTTTTATTACGCAAAACTAATCTATACACCTGAGGTGTGCCCAAACTGCAATTGTAAAAATATTAATGGTAATTTAATCAAAAATGGGTCTAAGACTTCTAGAATCACTATGCCTAAAATCTCCGAATATCCAACTTATATCATGTTGCGTAAGCAACGTT…	1498	1300-2300	Y
	ISSau9	IS21	-	4 - 8	TGTATATGTTAACTTAAAAGTGAGCCACCAACGCAATTGAAAAGTGAGCCACTTCTGTAGGAAAATAACCCTCGCACAATCGTTAGGGGGAACACAGGAGTGATTACGTTGCACAAGAAGCCACAGGTGATTCAGCTGCATCTTCAAGATGTCAGCCAAAGACAAATTTCCACAGAAGTGAAGGTCTCTAGAAACACCGTATCCAAATATATCGAAGCCTTTGAGAAGAGTAAGGCGACCGATGTTCGTAACCTGCCGGTACAGAAGATATTTATCGCCTCCTCCTACAAGAAAAGGCTGGAGTGAACGTAAATGACGGAAGAGATTGTGGAAAGGCTCAAGGGGTTCATTCAGGACAATGAATGGAAACGCAAAAACAACATGAGCAAGCAACAAATG…	2446	1750-2600	Y
Vibrio cholerae	ISAlg	IS3	IS3	3 - 4	TGTAGTGGTACGGTGAATTTGGTCACTTAATTAGAGGTGATATCATCATCTCATAAGTTAATAGGTGACATTTTGACAAAACGAACAAGACGGCTATTTAGTGCCGAATTCAAACTGGAAGCGGCACAATTACTGCTCGATCAAAACTACTCAGTGACTGAAGCGGCTCAAGCCATGAATGTAGGTAAATCTACGATGGATAAGTGGGTTCGCCAATTAAAACTAGAGCGCCAAGGCAAAGCACCTAAAGCGTCACCAATGACGCCTGAGCAAATTGAAATTCGTGAATTAAAAAAGAAGCTCGCTCGTCTTGAAGAGCATAATGAAATATTAAAAAAAGCCACGGCTCTCTTGATGTCGGACTCACTGAACAATTCTTGATGATCAAGAAACTCAAGC…	1258	1150-1750	Y
	ISVch1	IS481	-	4 - 15	TGTGATTCATAGACATCCTTTCAACTATACTGGGTGTCTATGGACAGAGAAATCCAACAAAGACTACAGTGGGTAAAAATGTATGAGGAATGTGGTGATGCAGGCCTCGTATGTCGACGCTGTGGTATTTCCAGACCAACATTACGAAAGTGGGCTAAGCGATATAAGCAATGTGGAATCGCTGGTCTGGAAAGCCAGAGCAGACGCCCTCATTCATCTCCAGATACCAAACTCACTGATGAGCTAAGAGCATTGATCCTTACGATGCGTGACAAACGCAATTTAGGGGCGCGACGTTTACAAACGGAATTAATCCGACTTCACAAAATACACCTAAGCACAGCGACACTCCATAAAGTTTTATCCGAAGCATCAGTCAAACCCATCGTAACTTACCGA…	1023	950-1300	Y
	ISVch3	IS21	-	4 - 8	TGCATATTTCGGAGCATTCCGATCAGTCATTTCGGTATTATCCGATCACCCATTTCGGTTTAAACCGATCACTGATTCCGCGATTATCCGATCACTTTTAGCCTAACTCCGAAATCGGTGATCGGAATAGCGAAAACCGCGATCGGAATGCCCGAAATCCTTCCTTTTTCTCTTTTAAATCAATCACTCGCTATTCTTTACTTCTTAAACAAGAACGTAAGGAAGCGACCATGGCTAAAAAGAGAACTCCAATGAACAAAATTAAAGAGGTATTACGCCTGAAGTACGACTGCGGTCTCTCAAATCGCAGCATCGCTTCTTGCCTTAAACTCGGGCCGTCCACCATCTCGGAACTCCTCACTCGCTTTAAACAAAGCCAACTTGGCTGGCCTCTACCCG…	2593	1750-2600	Y
	ISVch4	IS3	IS3	3 - 4	TGTAGTGGCATAGTGAATTTGGTCACTTAGTTAGAGGTGATATCATCACCTCATAAGTTAACAGGTGACATTATGACAAAACGTACAAGACGACTATTTAGCGCAGAATTTAAGTTAGAAGCAGCGCAGCTAGTCTTAGACCAAAATTACTCAGTGACGGAAGCAGCCCAAGCCATGAATGTGGGCAAGTCCACGATGGATAAATGGGTTCGCCAGCTTAGAGAAGAACGCCAAGGGAAAACACCTAAAGCTTCACCTATGACCCCTGAGCAAATAGAAATTCGGGAATTGAAAAAGAAGCTGGCTCGCCTTGAAGAGCATAATGAAATACTAAAAAAAGCCACGGCTCTCTTGATGTCGGACTCACTGAACAATTCTTGATAATCAAGAAACTCAAGC…	1258	1150-1750	Y
	ISVch5	IS5	IS5	4	GGGAAGATGCGATTAAGTCTCTGATATGAGATCATAGCAACCATCAAAACAGCAAGGATGAGGTGACCGATGAGTCATCAACTGACTTTCGCAGACGGTGAGTTTTCCAATAAACGTCGACAAACCCGCAAAGAGCTCTTCCTCGCCAGAATGGAGAAGCTCCTACCATGGTCTCAGTTGCTCGCGGTGATCGAACCCTTTTATCCCAAGGCGGGCAATGGCCGCCGCCCTTATCCTCTCGAAACCATGTTCCGCATCCACTGTATGCAGCAGTGGTACAGCTTAAGTGACGAAGCGATGGAAGATGCACTCTATGAGATCGCGTCCATGCGGTTATTTGCCCATCTTTCGCTGGACAGAGCCATTCCCGACCGCACTACCATCATGAACTTCCGCCAC…	1197	1000-1500	Y
	ISVch6	IS630	-	2	TACCAGTGATCATTGAAGATGCTTGATTTCTCATAAAATCAGGATCATGCTACGCTCCATGAAAATAACACTGACTCCCCAACAGAAACTACAACTCGAAGAGATGCACGATTCCACTCGTGATGGTCGAGTACGTGACCACATCAAAGCACTTGCGTCTGAAGGTTGGAGTCAGGCGATGATTTCTCAAGCTCTTCGCATTCACGAATCGACTGTTGCACGTCACCTCAGCGACTACGTGCTTTCTGAAAAACTCAAGCCTGAAAATGGTGGAAGCCAAAGTAAGCTTTCTGCTACCCAAACCATGCATCTAATCGAGCATTTGACTGAAAAAACTTATTTCCATACCCATCAAATCGTTGCTTACGTCGAGGCTGAATTCGCCGTTCGCTACACAGT…	1088	1000-1400	Y
	ISVch7	IS66	ISBst12	8 - 9	GTAAACCGTCAACAAGAACCCAATGAAAACAAAAAAAGGGGAACAATAACAACGGAACCCAATTTGCCCAATGAAGGAACAATCCCAACCGGCAAGCCGAACTGCATGACTAAGAAAAAATCAAAATTCTCATCCTCACCACCTATTGCCTCAGACATTAACGAAGCGAATGCGTTGATATCCGAGTTATGGGAACAGTTGCGCCATTATGAAGATAGGCTACAAACAAGCAGCGCTAATTCCTCTAAGTCTCCTTCCTCCGATGGACCCAAAGAGCGAGCTGAACGAAAAAAGCTCAAAGCTCTAGTGGTCGCCATCCGAGAGGAGCTAAACAAGGTCACGAAGGGCATAAACGACAACTCTCAGAACTAAAAGCATCCGATACGGTTGTTGATTGTT…	1588	1350-1900	Y
	ISVch8	IS5	IS903	9	GGCTTTGTTGCGTAAATCGATGGAACTAAATCAATAGCTTACGATCTGATCGGCTACATTCATTCACTCTGTAGCCTCATGCCGAAACCACGTTACAAAACAAACAACTGGAAACAATACAATCAAGCTCTCATCAATCGTGGTTCTCTGACTTTTTGGATTGACGAAGAAGCGATAAGTGAGTGGAAACAAGGGAAGCAAAACAAGCGTGGGAGACCTCGTGTTTTCAGTGATTTAGCCATCACTACTGCTTTGATGGTAAAGCGTATCTTTTCCATGCCACTGCGTGCTTCGCAAGGCTTTATGGATTCCGTTTTTCAACTTGCCCAACTCCCACTGCGCTGCCCACACTACAGTTGTATCAGTCGTCGAGCCAAAGACGTTAACGTGAGTTTCAAA…	1053	950-1150	Y
	ISVch9	IS5	IS5	4	GGGAAGATGCGAATAAGTCCCTGATGTGAGATCATAGCTATATAGTAAATCACAGCCATTACCGCCCATGTGCCAACAGTTAACTTTTGCCGATAGTGAGTTTTCCAGCAAGCGCCGCCAGACCCGTAAAGAGATTTTCTTATCTCGGATGGACAACCTGTTACCATGGACTCAACTGCTGGAAGTGATTGAGCCATTTTATCCAAAAGTGGGCAATGGTCGTCGTCCCTATCCACTGGAAACAATGTTCCGCATTCACTGCATGCAGCAATGGTACTGTCTGAGTGATGAAGCGATGGAAGATGCGCTTTACGAGATTGCTTCGATGCGACAGTTTGCACAACTGTCACTGGCTAAAGCCATTCCTGACCGCACCACCATTATGAATTTCCGGCACTT…	1195	1000-1500	Y
