# Supplementary material for: panISa: ab initio detection of insertion sequences in bacterial genomes from short read sequence data
Source: Oxford University Press journal article supplement (doi:10.1093/bioinformatics/bty479), 2018-06-13
Supplement: bioinformatics_34_22_3795_s6.xlsx [file bioinformatics_34_22_3795_s6.xlsx]

## Sheet: Feuille1
	Homologous IS	Forward primer	Reverse primer
	ISPa1635	TGTAGGTGGATTTACCGCCC	GCTACTTCATCGAGCTGCCA
	ISPa45	AGGAAATCCGCCTGGAACTG	CTTTTCGTTGGCACGCTACC
	ISPa77	GTGCGCGAATCCGAAAATGA	GTGCGCGAATCCGAAAATGA
	ISPst3	CCTGTCCCGGTGTCTTTAGG	TTACCTATCAAGGCGCACCA
	ISPpu7 partial	TGACGAATGCAGGAGAGGTG	TACGCGATGCTGCTGATACC
	ISPst5	GGTAGATGGACGGTTCCCAG	TAGCGCTATGGCCTTGGTTG
