# Supplementary material for: panISa: ab initio detection of insertion sequences in bacterial genomes from short read sequence data
Source: Oxford University Press journal article supplement (doi:10.1093/bioinformatics/bty479), 2018-06-13
Supplement: bioinformatics_34_22_3795_s7.xlsx [file bioinformatics_34_22_3795_s7.xlsx]

## Sheet: bwa_7139915_7132693
Chromosome	End position	End clipped reads	Direct repeats	Start position	Start clipped reads	Inverted repeats	Left sequence	Right sequence
contig-1000003	83409	63	GGGGCACGGC	83400	41	1 caatgtcatcaac -- gttgatgacattg -1	CAATGTCATCAACTTTGGAAATTATCCATAAATATCATATAATTAGCGCTCAAATCAGTGCATGGGAGAAGNN	NNNNNNNNNNNNNNNNNNNNNNNNNNNNNNNNNNNNNNNNNNNNANGNNNANGNCGGCNNGNNGCTTNNGGGGGCTTGCCTTGGGCAGGGCTGCAGCTTAGGTTGATGACATTG
contig-1000003	83822	54	GGAGCAAGGT	83813	62	1 caatgtcatcaac -- gttgatgacattg -1	CAATGTCATCAACCTAAGCTGCAGCCCTGCCCAAGGCAAGCCCCCCGAAGCAGCCAGCCGCCATGGCCGTCNN	GGCTTCTCCCATGCACTGATTTGAGCGCTAATTATATGATATTTATGGATAATTTCCAAAGTTGATGACATTG
contig-1000005	75975	43	CGGGATGGCC	75966	73	1 caatgtcatcaac -- gttgatgacattg -1	CAATGTCATCAACCTAAGCTGCAGCCCTGCCCAAGGCAAGCCCCCCGAAGCAGCCAGCCGCCATGGCCNNNNNNN	NNNNNNNGGGCTTCTCCCATGCACTGATTTGAGCGCTAATTATATGATATTTATGGATAATTTCCAAAGTTGATGACATTG
contig-1000006	240073	99	GGTAAAAGAT	240064	46	1 caatgtcatcaac -- gttgatgacattg -1	CAATGTCATCAACCTAAGCTGCAGCCCTGCCCAAGGCAAGCCCCCCGAAGCAGCNAGCCGCCNTGGCCGTNNNNNNNNNN	NCTTCTCCCATGCACTGATTTGAGCGCTAATTATATGATATTTATGGATAATTTCCAAAGTTGATGACATTG
contig-1000007	186449	53	GGGAAAGGTT	186440	71	1 caatgtcatcaac -- gttgatgacattg -1	CAATGTCATCAACTTTGGAAATTATCCATAAATATCATATAATTAGCGCTCAAATCAGTGCATGGGAGNNNCNNN	GGNCNNNGCNGCNNGCTGCTTCGGGGGGCTTGCCTTGGGCAGGGCTGCAGCTTAGGTTGATGACATTG
contig-11	52601	39	GGGTCAGCACC	52591	70	2 aatgtcatcaac -- gttgatgacatt -1	CAATGTCATCAACCTAAGCTGCAGCCCTGCCCAAGGCAAGCCCCCCGAAGCAGCCAGCCNCCATNNNNGTNNNNNNNANANNNNNN	NNNNNNNNNNNNNNNNNNNNGCTTCTCCCATGCACTGATTTGAGCGCTAATTATATGATATTTATGGATAATTTCCAAAGTTGATGACATT
contig-11	139528	33	GCCGCTGGAC	139519	44	1 caatgtcatcaac -- gttgatgacattg -1	CAATGTCATCAACCTAAGCTGCAGCCCTGCCCAAGGCAAGCCCCCCGAAGCAGCCAGCCGCNATGNNNN	NNNTTCTCCCATGCACTGATTTGAGCGCTAATTATATGATATTTATGGATAATTTCCAAAGTTGATGACATTG
contig-13	13739	25	ATATACATACC	13729	48	1 aatgtcatcaac -- gttgatgacatt -2	AATGTCATCAACCTAAGCTGCAGCCCTGCCCAAGGCAAGCCCCCCGAAGCAGNNANCCGCCNNNNNNNNNNNN	NNNNNNNCCCATGCACTGATTTGAGCGCTAATTATATGATATTTATGGATAATTTCCAAAGTTGATGACATTG
contig-14	83883	23	AAGAAGTGGGATGGCAAGAAGAAGTGGGA	83855	27	No IR	TGGCAAGAAGAAGTGGGACAAAGGCGGCCGCGGCGN	NNNANNNNNNNCANGNAGCCCTGGGACGGCAAGAAGTGGGATGGCAAG
contig-14	160646	50	GGCGCTGCCC	160637	60	1 caatgtcatcaac -- gttgatgacattg -1	CAATGTCATCAACTTTGGAAATTATCCATAAATATCATATAATTAGCGCTCAAATCNNTGCATGGGAGAAGNNNNNNNNNN	NNNNNNNNNNNNNNNNGACGGCCATGGCGGCTGGCTGCTTCGGGGGGCTTGCCTTGGGCAGGGCTGCAGCTTAGGTTGATGACATTG
contig-14	245054	43	GCTATCCACCC	245044	62	2 aatgtcatcaac -- gttgatgacatt -1	CAATGTCATCAACCTAAGCTGCAGCCCTGCCCAAGGCAAGCCCCCCGAAGCAGCCAGCCGCCATGGCCGTC	NNNNNNNNNNNAGNANNNNNNNGNNNNNNTCNNATGCACTGATTTGAGCGCTAATTATATGATATTTATGGATAATTTCCAAAGTTGATGACATT
contig-2000000	2131	51	GGAGGCTCGGG	2121	47	2 aatgtcatcaac -- gttgatgacatt -1	CAATGTCATCAACCTAAGCTGCAGCCCTGCCCAAGGCAAGCCCCCCGAAGCAGCCAGCCGCCATGGCCGTCGG	NTCTCCCATGCACTGATTTGAGCGCTAATTATATGATATTTATGGATAATTTCCAAAGTTGATGACATT
contig-2000002	41873	33	GGTTCGGTGC	41864	20	1 caatgtcatcaac -- gttgatgacattg -1	CAATGTCATCAACTTTGGAAATTATCCATAAATATCATATAATTAGCGCTCAAATCAGTGCATGGGAGAA	NNNNNNNNNNNNNNNNNGGCTGCTTCGGGGGGCTTGCCTTGGGCAGGGCTGCAGCTTAGGTTGATGACATTG
contig-2000003	56655	63	GGCGATTCAGA	56645	64	2 aatgtcatcaac -- gttgatgacatt -1	CAATGTCATCAACTTTGGAAATTATCCATAAATATCATATAATTANCNCTCAAATCNNTNCNNNGNNNCNNNNNATCTNNTNTGNNNNNNTCNNNNNNNNNNNNNNN	NNNNNNNNNNNNNNNNNNNNNNNNNNNNNNNNNNNNNANNNCNNNNNGCCATGGCNGCTGGCTGCTTCGGGGGGCTTGCCTTGGGCAGGGCTGCAGCTTAGGTTGATGACATT
contig-2000003	58432	71	GGGGTTCGACCA	58421	52	1 atgtcatcaac -- gttgatgacat -3	ATGTCATCAACCTAAGCTGCAGCCCTGCCCAAGGCAAGCCCCCCGAAGCAGCCAGCCGCCATGGCCGTCGGG	NNNNNNNNNNNNNNNNNNNNNNNNNNNNNNNNCNCATGCACTGATTTGAGCGCTAATTATATGATATTTATGGATAATTTCCAAAGTTGATGACATTG
contig-2000003	317704	48	GGTCGCGTAC	317695	63	1 caatgtcatcaac -- gttgatgacattg -1	CAATGTCATCAACCTAAGCTGCAGCCCTGCCCAAGGCAAGCCCCCCGAAGCAGCCAGCCGCCATGGC	NGCTTCTCCCATGCACTGATTTGAGCGCTAATTATATGATATTTATGGATAATTTCCAAAGTTGATGACATTG
contig-2000003	334451	59	GTCCTGGAGC	334442	40	1 caatgtcatcaac -- gttgatgacattg -1	CAATGTCATCAACTTTGGAAATTATCCATAAATATCATATAATTAGCGCTCAAATCAGTGCATGGGAGNNGNC	NNNNNGGCCATGGCGGCTGGCTGCTTCGGGGGGCTTGCCTTGGGCAGGGCTGCAGCTTAGGTTGATGACATTG
contig-2000004	47608	59	CGGTCCGACCC	47598	41	1 aatgtcatcaac -- gttgatgacatt -2	AATGTCATCAACTTTGGAAATTATCCATAAATATCATATAATTAGCGCTCAAATCAGTGCATGGGAGNAGCCNNNNNNNNNNNNNNNNNNNNNCNNNNTNNNN	NNNNNNNNNNNNNNNNNNNNNNNNNNNNNNNNNNNNNNNNNNNNNNNNNNNNNNNNNNNNNNNNNNNNNNNNGGCTGNTTCGGGGGGCTTGCCTTGGGCAGGGCTGCAGCTTAGGTTGATGACATTG
contig-2000008	63779	42	GGATCGCGGT	63770	51	1 caatgtcatcaac -- gttgatgacattg -1	CAATGTCATCAACTTTGGAAATTATCCATAAATATCATATAATTAGCGCTCAAATCAGTGCATGGGAGAAGCCN	NGACGGCCATGGCGGCTGGCTGCTTCGGGGGGCTTGCCTTGGGCAGGGCTGCAGCTTAGGTTGATGACATTG
contig-2000014	60536	46	ATATTTACCC	60527	56	1 caatgtcatcaac -- gttgatgacattg -1	CAATGTCATCAACTTTGGAAATTATCCATAAATATCATATAATTAGCGCTCAAATCAGTGCATGGGNNANGNC	NNNNCNNNGGCCATGGCGGCTGGCTGCTTCGGGGGGCTTGCCTTGGGCAGGGCTGCAGCTTAGGTTGATGACATTG
contig-2000014	124501	72	CCTTGAATGCC	124491	44	1 aatgtcatcaac -- gttgatgacatt -2	AATGTCATCAACTTTGGAAATTATCCATAAATATCATATAATTAGCGCTCAAATCAGTGCNTGNGNNNNNN	NNGGCCATGGCGGCTGGCTGCTTCGGGGGGCTTGCCTTGGGCAGGGCTGCAGCTTAGGTTGATGACATTG
contig-2000015	1233	47	TGATGTACCACC	1222	74	3 atgtcatcaac -- gttgatgacat -1	CAATGTCATCAACTTTGGAAATTATCCATAAATATCATATAATTAGCGCTCAAATCAGTGCATGGGAGAAGCC	NNNNCNCCGACGGCCATGGCGGCTGGCTGCTTCGGGGGGCTTGCCTTGGGCAGGGCTGCAGCTTAGGTTGATGACAT
contig-3000002	49030	61	GGCGGCATAT	49021	50	1 caatgtcatcaac -- gttgatgacattg -1	CAATGTCATCAACTTTGGAAATTATCCATAAATATCATATAATTAGCGCTCAAATCAGTGCATGGGAGNNGNCNNNN	NNGACGGCCATGGCGGCTGGCTGCTTCGGGGGGCTTGCCTTGGGCAGGGCTGCAGCTTAGGTTGATGACATTG
contig-4	212475	47	GGGTACAGGC	212466	57	1 caatgtcatcaac -- gttgatgacattg -1	CAATGTCATCAACTTTGGAAATTATCCATAAATATCATATAATTAGCGCTCAAATCAGTGCNTGGGNNNNNNNNN	ACGGCCATGGCGGCTGGCTGCTTCGGGGGGCTTGCCTTGGGCAGGGCTGCAGCTTAGGTTGATGACATTG
contig-4	228772	46	AGGTCCAGAC	228763	45	1 caatgtcatcaac -- gttgatgacattg -1	CAATGTCATCAACTTTGGAAATTATCCATAAATATCATATAATTAGCGCTCAAATCAGTGCATGGGAGAN	NNNNNNNNNNNNNNNNNNNNNNNNNNNNNNNNNNNNNNANNNNNANGGCGGCTGGCTGCTTCGGGGGGCTTGCCTTGGGCAGGGCTGCAGCTTAGGTTGATGACATTG
contig-4000001	1077	32	GCCTATGGAGC	1067	48	2 aatgtcatcaac -- gttgatgacatt -1	CAATGTCATCAACTTTGGAAATTATCCATAAATATCATATAATTAGCGCTCAAATCAGTNNNTNNGAGNNNNCNNNNNNNNNNNNNNNNNNNNNNNNNNNN	CCCGACGGCCATGGCGGCTGGCTGCTTCGGGGGGCTTGCCTTGGGCAGGGCTGCAGCTTAGGTTGATGACATT
contig-4000007	15610	38	GGCCTCGGCC	15601	38	1 caatgtcatcaac -- gttgatgacattg -1	CAATGTCATCAACCTAAGCTGCAGCCCTGCCCAAGGCAAGCCCCCCGAAGCAGCCAGCCGCCNTNNNNNTNGNNNNNNNNNNNNNNNNNNNNNNNNNNNNNNNN	NNNNNNNNNNTCCCATGCACTGATTTGAGCGCTAATTATATGATATTTATGGATAATTTCCAAAGTTGATGACATTG
contig-5000001	3115	68	GGGTGCGATC	3106	40	1 caatgtcatcaac -- gttgatgacattg -1	CAATGTCATCAACTTTGGAAATTATCCATAAATATCATATAATTAGCGCTCAAATCAGTGCATGGGAGNANNN	NNNNNNNNNNNNNNNNNNNNNNNNNGCGGCTGGCTGCTTCGGGGGGCTTGCCTTGGGCAGGGCTGCAGCTTAGGTTGATGACATTG
contig-6000008	144889	35	GGTCCGTAAC	144880	40	1 caatgtcatcaac -- gttgatgacattg -1	CAATGTCATCAACTTTGGAAATTATCCATAAATATCATATAATTNNCGCTCAAATCNNNNCATGGG	NCCGACGNCCATGGCGGCTGGCTGCTTCGGGGGGCTTGCCTTGGGCAGGGCTGCAGCTTAGGTTGATGACATTG
contig-7000009	379	71	GCGGCAGCCCC	369	81	1 aatgtcatcaac -- gttgatgacatt -2	AATGTCATCAACTTTGGAAATTATCCATAAATATCATATAATTAGCGCTCAAATCAGTGCATGGGAGNNNNNN	NNNNNNNNNNNNNNNCNNCGNNCATGNCGGCTGGCTGCTTCGGGGGGCTTGCCTTGGGCAGGGCTGCAGCTTAGGTTGATGACATTG
contig-7000009	182842	41	CTGCACGGCC	182833	53	1 caatgtcatcaac -- gttgatgacattg -1	CAATGTCATCAACCTAAGCTGCAGCCCTGCCCAAGGCAAGCCCCCCGAAGCAGCCAGCCGCCATGGCN	NNNNNNNNNNNNNNGGCTTCTCCCATGCACTGATTTGAGCGCTAATTATATGATATTTATGGATAATTTCCAAAGTTGATGACATTG
contig-7000009	233336	67	GGGGTCGAACC	233326	29	2 aatgtcatcaac -- gttgatgacatt -1	CAATGTCATCAACCTAAGCTGCAGCCCTGCCCAAGGCAAGCCCCCCGAAGCAGCCAGCNGNCATGGNNGNNNNNNNN	NNNNNNNNNNNNNNNNNNNNNNNNNNNNNNNNCNNNGNNNNGNTTTGAGCGCTAATTATATGATATTTATGGATAATTTCCAAAGTTGATGACATT
contig-9	156056	57	GGGTGCGGGC	156047	79	1 caatgtcatcaac -- gttgatgacattg -1	CAATGTCATCAACCTAAGCTGCAGCCCTGCCCAAGGCAAGCCCCCCGAAGCAGCCAGCCGCCATGGCCGTCGNNNNNNNNNNNNNNNNNNNNNNNNNNNNNNNNNNNNNNNNNNNNNNNNN	NNNNNNTCCCATGCACTGATTTGAGCGCTAATTATATGATATTTATGGATAATTTCCAAAGTTGATGACATTG
contig-9	206794	46	GGCAGCTTGGT	206784	68	2 aatgtcatcaac -- gttgatgacatt -1	CAATGTCATCAACTTTGGAAATTATCCATAAATATCATATAATTAGCGCTCAAATCAGTGCATGGGAGAAGCCN	CGACGGCNATGGCGGCTGGCTGCTTCGGGGGGCTTGCCTTGGGCAGGGCTGCAGCTTAGGTTGATGACATT
contig-9	207491	58	GGGTAACCAG	207482	41	1 caatgtcatcaac -- gttgatgacattg -1	CAATGTCATCAACTTTGGAAATTATCCATAAATATCATATAATTAGCGCTCAAATCAGTGCATGGGAGANNNNN	NNNNNNNNNNNNNNNNNNNNNCNNNNNNNTCNNNNNNNNNNNNNNNGNNNGCTTCGGGGGGCTTGCCTTGGGCAGGGCTGCAGCTTAGGTTGATGACATTG
